# Supplementary material
Source: PubMed Central journal article supplement (PMC2897540)
Supplement: supp_30_14_3519__1.pdf [file supp_30_14_3519__1.pdf]

**SUPPLEMENT FIGURE AND MOVIE LEGENDS.**

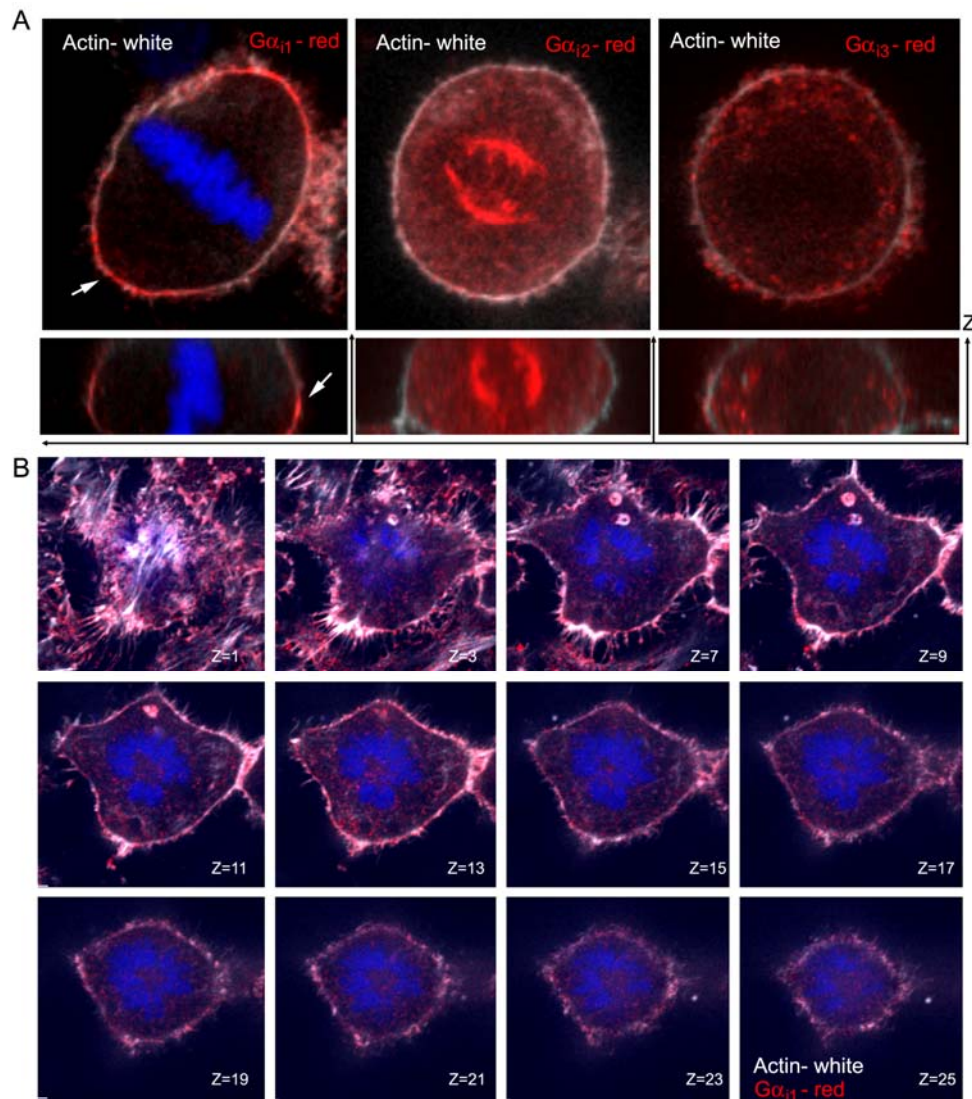

**Figure S1.**  $G\alpha_i$  and F-actin localization. (A)  $G\alpha_{i1}$ ,  $G\alpha_{i2}$ , and  $G\alpha_{i3}$  versus F-actin in metaphase HeLa cells. HeLa cells were fixed (paraformaldehyde) and immunostained for  $G\alpha_{i1}$ ,  $G\alpha_{i2}$ , or  $G\alpha_{i3}$  and stained with Alexa Fluor-488 phalloidin. A confocal image is shown along with the X-Z projection created in Imaris. DNA was stained (blue) in the first panel, but not the two other. Phalloidin staining is shown in white. (B) Co-localization of F-actin and  $G\alpha_{i1}$  in a prophase HeLa cell. Shown are selected confocal images from a sequential image Z-stack (0.5  $\mu\text{m}$  per slice) immunostained for F-actin (white) and  $G\alpha_{i1}$  (red).

**Movie 1.** Co-localization of Ric-8A immunoreactivity with CENP-E. Confocal images from a z-stack acquired every 0.5 $\mu$ m between slices from fixed HeLa cells immunostained for Ric-8A (green) and CENP-E (red). DNA is blue.

**Movie 2.** Live cell imaging of GFP-Ric-8A expressed in HeLa cells. HeLa cells were transiently transfected with GFP-Ric-8A 48 hours previously and a mitotic cell was imaged from shortly after metaphase until cytokinesis. A single slice was acquired every minute.

**Movie 3.** Localization of Dynein in metaphase HeLa cells. HeLa cells growing on collagen coated dishes were fixed, immunostained for Dynein (green), and imaged (0.5  $\mu$ m between slices).

**Movie 4.** Localization of Dynein in metaphase HeLa cells treated with pertussis toxin. HeLa cells growing on collagen coated dishes were treated with pertussis toxin (400 ng/ml for 4 hours), fixed, immunostained for Dynein (green), and imaged (0.5  $\mu$ m between slices).

**Movie 5.** Localization of Dynein in metaphase HeLa cells with reduced Ric-8A expression. HeLa cells growing on collagen coated dishes were transiently transfected with a Ric-8A siRNA pool x2, fixed, immunostained for Dynein (green), and imaged (0.5  $\mu$ m between slices).

**Movie 6.** Localization of Dynein in metaphase HeLa cells with reduced  $G\alpha_{i1-3}$  expression. HeLa cells growing on collagen coated dishes were transiently transfected with a  $G\alpha_{i1-3}$  siRNA pool x2, fixed, immunostained for Dynein (green), and imaged (0.5  $\mu$ m between slices).

**Movie 7.** Localization of Dynein in metaphase HeLa cells with reduced Ric-8A expression. HeLa cells growing on collagen coated dishes were transiently transfected with a Ric-8A shRNA x2, fixed, immunostained for Dynein (green), and imaged (0.5  $\mu$ m between slices).

**Movie 8.** Localization of Dynein in metaphase HeLa cells treated with wortmannin. HeLa cells growing on collagen coated dishes were treated with wortmannin (10 nM for 2 hrs), fixed, immunostained for Dynein (green), and imaged (0.5  $\mu$ m between slices).

**Movies 9 & 10.** Live cell imaging of control and Ric-8 knockdown HeLa cells expressing  $\alpha$ -tubulin GFP. Time lapse live cell images of control shRNA or Ric-8A shRNA

transiently transfected  $\alpha$ -tubulin GFP HeLa cells are shown in maximal projection. Time of image acquisition indicated in the bottom left corner.

**Movies 11 & 12.** Individual HeLa cell expressing  $\alpha$ -tubulin GFP from control shRNA or Ric-8 shRNA transfected cells. Maximum projection electronically zoomed time series of individual control and Ric-8A knockdown cell from overnight live cell imaging. Images acquired every three minutes.

**Movies 13 & 14.** Individual HeLa cell expressing  $\alpha$ -tubulin GFP from control or a Ric-8 siRNA transfected cells. Electronically zoomed time series of individual control siRNA or Ric-8A siRNA transfected cells from 10 minutes of live cell imaging. Images collected every 30 seconds using a spinning disk confocal microscope with a 63X objective.
